# Supplementary material
Source: ML conference proceedings conference paper supplement (https://openaccess.thecvf.com/content/CVPR2026/html/Zhao_FSFSplatter_Geometrically_Accurate_CVPR_2026_paper.html)
Supplement: Supplementary file 1 [file Zhao_FSFSplatter_Geometrically_Accurate_CVPR_2026_supplemental.pdf]

# FSFSplatter: Geometrically Accurate Reconstruction with Free Sparse-view Images within 2 minutes

## Supplementary Material

### A.1. Details of framework and implementation

#### A.1.1. Implementation

The scene representation of FSFSplatter is based on 2DGS, and the rasterization pipeline is implemented based on AbsGS [12] and TrimGS [2]. Compared to basic 2DGS pipeline [4], the rasterization pipeline of FSFSplatter employs Abs accumulated gradient  $\bar{\Delta}_i^{\text{ACC}}$  when calculating the accumulated gradient  $\Delta_i^{\text{ACC}}$  (i.e., the gradient of the loss function  $\mathcal{L}$  with respect to the projected pixel coordinate  $u$ ). This approach mitigates gradient collision, thereby accurately addressing the blurring and loss of detail caused by over-reconstruction during Gaussian splitting, as shown in Eq. (A1). Here,  $m$  denotes the sequence of all affected pixels. Contribution-based pruning is implemented following TrimGS, with the key distinction being the extension from pruning designed for NVS in 3DGS to pruning designed for surface reconstruction in 2DGS, as formulated in ??.

$$\bar{\Delta}_i^{\text{ACC}} = \sum_{j=1}^m \left| \frac{\partial \mathcal{L}_j}{\partial u_i} \right|, \quad \Delta_i^{\text{ACC}} = \sum_{j=1}^m \frac{\partial \mathcal{L}_j}{\partial u_i} \quad (\text{A1})$$

#### A.1.2. Parameter Setting

For the contribution-based Gaussian pruning, we perform a pruning at the start of optimization and subsequently repeat it every 500 iterations, removing the 5% of Gaussian primitives with the lowest contribution. Experiments were performed with different pruning configurations. As presented in Tab. A1, fine-tuning the inter-pruning iteration intervals and pruning ratio to increase the total pruning quantity yielded improvements in optimization speed, while maintaining surface reconstruction accuracy and incurring a minor degradation in NVS.

| Trim per Iter | Trim Percent | CD(mm)↓ | LPLPS↓ | PSNR↑ | SSIM↑ | Times↓ |
|---------------|--------------|---------|--------|-------|-------|--------|
| 300           | 5%           | 36.42   | 0.119  | 35.13 | 0.962 | 104.2  |
| 300           | 10%          | 37.74   | 0.118  | 35.51 | 0.963 | 102.2  |
| 300           | 20%          | 35.21   | 0.121  | 35.35 | 0.962 | 99.2   |
| 500           | 5%           | 33.66   | 0.095  | 35.79 | 0.965 | 107.3  |
| 500           | 10%          | 39.91   | 0.118  | 35.57 | 0.963 | 104.1  |
| 500           | 20%          | 36.12   | 0.119  | 35.33 | 0.962 | 103.4  |

Table A1. Parameter tuning experiment of contribution-based pruning on Replica datasets.

For the loss function, the parameters  $m$ ,  $n_1$ , and  $n_2$  are set to  $1 \times 10^{-4}$ ,  $1 \times 10^{-2}$ , and  $1 \times 10^{-4}$ , respectively.

Furthermore, we evaluated the splitting parameter  $N$  (set as 2) for Gaussian self-splitting head. As shown in Tab. A2, since features before splitting are pixel-aligned and semi-dense, merely increasing the number of splits does not enhance the accuracy of the dense Gaussian scene. Instead, it significantly increases the time consumed during rasterization.

| Split Number | Points Num | Rasterizer Times↓ | PSNR↑ | SSIM↑ | LPIPS↓ |
|--------------|------------|-------------------|-------|-------|--------|
| 1            | 473088     | 12.568            | 21.42 | 0.761 | 0.308  |
| 2            | 913408     | 13.436            | 23.70 | 0.786 | 0.248  |
| 4            | 1753088    | 27.387            | 23.89 | 0.799 | 0.231  |
| 8            | 3702784    | 53.139            | 23.47 | 0.787 | 0.280  |

Table A2. Parameter tuning experiment of self-splitting Gaussian head.

#### A.1.3. Evaluation Metrics

We employ PSNR, SSIM, and LPIPS to comprehensively evaluate the quality of NVS. For DTU datasets [1] and BlendedMVS datasets [11], where transparent masks are provided, we apply masks to all images prior to evaluation to ensure fair comparisons. To assess surface reconstruction quality, we utilize the Chamfer Distance (CD). Following previous works [1, 5], we adopt the L2 Chamfer Distance as our evaluation metric, as shown in Eq. (A2).

$$\text{CD}(\mathcal{M}, \mathcal{M}_{\text{gt}}) = \frac{1}{2|\mathcal{M}|} \sum_{x \in \mathcal{M}} \min_{y \in \mathcal{M}_{\text{gt}}} \|x - y\|_2 + \frac{1}{2|\mathcal{M}_{\text{gt}}|} \sum_{y \in \mathcal{M}_{\text{gt}}} \min_{x \in \mathcal{M}} \|x - y\|_2 \quad (\text{A2})$$

Since surface reconstruction from free RGB images is inherently scale-ambiguous, we perform surface registration to align reconstructed surfaces with ground truth surfaces for accurate evaluation. Following prior work [3], we first register and evaluate camera poses by sampling points from the camera optical centers and viewing directions and Iterative Closest Point (ICP) alignment. This step brings the surfaces into rough alignment. However, unlike previous methods that treat camera intrinsics as known priors, our approach predicts intrinsics via a neural network. As a result, direct camera pose alignment alone is insufficient due to errors in estimated intrinsics. To address this, we further refine the alignment by performing descriptor-based point cloud registration [8], ensuring accurate cor-

|         |         | CF-3DGS |        | FreeSplatter |        | Fast3R |        | Dust3r |        | VGGT  |       | Ours  |       |
|---------|---------|---------|--------|--------------|--------|--------|--------|--------|--------|-------|-------|-------|-------|
|         |         | Rot     | Trans  | Rot          | Trans  | Rot    | Trans  | Rot    | Trans  | Rot   | Trans | Rot   | Trans |
| Replica | Office0 | 74.930  | 38.575 | 51.045       | 28.432 | 4.236  | 4.417  | 35.950 | 3.916  | 0.794 | 2.326 | 0.800 | 2.319 |
|         | Office1 | 43.651  | 31.719 | 62.805       | 42.110 | 11.592 | 4.145  | 60.846 | 3.468  | 0.778 | 3.625 | 0.740 | 3.426 |
|         | Office2 | 24.612  | 190.52 | 44.780       | 128.35 | 0.526  | 4.870  | 29.353 | 12.435 | 0.442 | 3.156 | 0.419 | 2.980 |
|         | Room0   | 44.478  | 173.42 | 32.990       | 229.53 | 0.497  | 2.343  | 38.550 | 13.274 | 0.889 | 8.321 | 0.893 | 8.308 |
|         | Room1   | 38.663  | 243.30 | 44.063       | 109.78 | 0.306  | 2.411  | 34.774 | 5.936  | 0.332 | 1.760 | 0.318 | 1.695 |
| DTU     | scan24  | 23.123  | 10.736 | 4.830        | 30.796 | 1.501  | 3.564  | 29.952 | 1.880  | 0.147 | 0.383 | 0.152 | 0.388 |
|         | scan37  | 56.389  | 95.731 | 10.628       | 8.832  | 5.295  | 18.280 | 47.159 | 15.749 | 0.461 | 1.446 | 0.441 | 1.458 |
|         | scan40  | 50.555  | 70.607 | 6.443        | 15.590 | 1.289  | 5.681  | 59.713 | 7.021  | 0.626 | 1.418 | 0.628 | 1.438 |
|         | scan55  | 30.339  | 69.516 | 4.707        | 15.411 | 1.325  | 11.293 | 49.758 | 4.359  | 0.203 | 1.209 | 0.216 | 1.221 |
|         | scan63  | 39.299  | 79.984 | 3.520        | 30.415 | 4.760  | 17.137 | 37.742 | 17.378 | 0.530 | 2.206 | 0.516 | 2.203 |
|         | scan65  | 11.181  | 94.896 | 6.210        | 39.433 | 2.124  | 16.450 | 25.381 | 12.917 | 0.230 | 1.241 | 0.276 | 1.125 |
|         | scan69  | 54.851  | 72.511 | 2.941        | 13.699 | 1.896  | 6.562  | 41.689 | 7.427  | 0.128 | 1.853 | 0.092 | 1.826 |
|         | scan83  | 42.331  | 86.062 | 1.877        | 12.644 | 6.083  | 36.981 | 77.169 | 26.918 | 0.325 | 2.530 | 0.487 | 2.181 |
|         | scan97  | 29.318  | 67.483 | 16.416       | 30.376 | 2.506  | 12.922 | 56.655 | 13.913 | 0.308 | 1.073 | 0.313 | 1.069 |
|         | scan105 | 54.325  | 67.535 | 3.267        | 26.114 | 3.190  | 26.857 | 34.217 | 8.835  | 0.219 | 2.054 | 0.210 | 2.108 |
|         | scan106 | 54.349  | 72.003 | 5.200        | 8.806  | 0.460  | 10.196 | 41.294 | 4.361  | 0.359 | 1.196 | 0.366 | 1.215 |
|         | scan110 | 40.470  | 61.468 | 10.383       | 13.227 | 1.909  | 7.209  | 42.506 | 8.192  | 0.296 | 0.810 | 0.301 | 0.761 |
|         | scan114 | 8.837   | 61.963 | 5.450        | 38.759 | 1.854  | 10.781 | 26.354 | 10.068 | 0.357 | 1.123 | 0.363 | 1.086 |
|         | scan118 | 43.873  | 81.839 | 2.640        | 3.735  | 2.032  | 15.600 | 35.484 | 10.656 | 0.081 | 0.576 | 0.089 | 0.502 |
|         | scan122 | 34.831  | 71.341 | 4.121        | 23.594 | 2.499  | 13.661 | 39.012 | 8.106  | 0.244 | 0.366 | 0.257 | 0.258 |

Table A3. Detailed pose estimation experiments, Rot( $^{\circ}$ ) $\downarrow$  and Trans(mm) $\downarrow$ , on Replica and DTU datasets.

|                                  | scan24 | scan37 | scan40 | scan55 | scan63 | scan65 | scan69 | scan83 | scan97 | scan105 | scan106 | scan110 | scan114 | scan118 | scan122 | Mean  |
|----------------------------------|--------|--------|--------|--------|--------|--------|--------|--------|--------|---------|---------|---------|---------|---------|---------|-------|
| <b>Ours</b>                      | 1.300  | 2.103  | 1.767  | 1.468  | 2.066  | 1.476  | 1.339  | 2.191  | 1.736  | 1.479   | 1.419   | 1.420   | 0.793   | 1.572   | 1.583   | 1.581 |
| No $\mathcal{L}_{\text{rank}}$   | 2.012  | 4.942  | 2.639  | 2.130  | 3.900  | 3.800  | 2.856  | 3.472  | 3.095  | 2.450   | 2.041   | 2.453   | 1.338   | 4.244   | 2.200   | 2.905 |
| No $\mathcal{L}_{\text{smooth}}$ | 2.395  | 4.096  | 2.046  | 1.922  | 3.240  | 2.716  | 3.353  | 3.445  | 4.266  | 2.119   | 2.799   | 1.489   | 1.360   | 2.651   | 1.895   | 2.653 |
| No $\mathcal{L}_{\text{MVS}}$    | 2.348  | 3.639  | 3.192  | 2.992  | 5.926  | 2.855  | 3.014  | 3.304  | 3.013  | 2.853   | 2.709   | 3.991   | 1.886   | 3.218   | 2.008   | 3.130 |
| No $T_k^{\text{cam}}$            | 2.638  | 3.270  | 3.046  | 2.581  | 5.687  | 3.366  | 3.319  | 2.624  | 4.203  | 1.715   | 1.529   | 2.115   | 1.326   | 3.625   | 1.783   | 2.855 |
| <b>Ours(wo Opt.)</b>             | 1.592  | 2.580  | 2.040  | 1.878  | 2.950  | 1.743  | 1.572  | 6.820  | 2.167  | 1.534   | 1.689   | 2.052   | 0.921   | 1.895   | 1.692   | 2.208 |
| No Trim                          | 1.824  | 3.529  | 1.849  | 4.041  | 5.839  | 2.328  | 3.222  | 2.326  | 3.271  | 2.256   | 2.299   | 3.635   | 2.510   | 2.904   | 2.113   | 2.930 |
| No $\mathbb{D}$                  | 2.727  | 5.567  | 3.328  | 2.866  | 7.388  | 4.053  | 2.597  | 4.040  | 5.181  | 2.486   | 3.326   | 3.332   | 1.949   | 2.040   | 2.880   | 3.584 |

Table A4. Detailed ablation experiments, CD(mm) $\downarrow$ , on DTU datasets.

respondence between reconstructed and ground truth surfaces. CF-3DGS enables pose-free reconstruction of Gaussian splatting scenes, but it still requires camera intrinsics as input. In our experiments, we provide ground truth intrinsics to this method.

For methods that represent the scene as point clouds or depth maps (VGGT [6], DUST3R [7], and Fast3R [9]), default mesh generation pipelines are not provided. Therefore, we adopt an Open3D [13] Voxel-TSDF surface extraction strategy as the baseline to extract meshes for fair comparison.

For evaluating camera pose estimation quality, we use the RMSE. Since FSFSplatter is entirely based on RGB images, estimated poses differ from the ground truth by a scale factor. Following prior research [3], we perform rigid registration on the camera poses before evaluation and compute the absolute error in the ground truth scale. This approach eliminates inconsistencies in error evaluation caused by scale differences.

## A.2. Detailed experiments

### A.2.1. Detailed NVS quantization experiments

Tab. 2 presents the average quantitative evaluation results of NVS on DTU, Replica, and BlendedMVS datasets, while Tab. A6, Tab. A7, and Tab. A8 provide the detailed per-scene evaluation results for each dataset.

### A.2.2. Detailed ablation study

Tab. 6 presents the average CD of ablation study on DTU and Replica datasets, while Tab. A4 and Tab. A10 provide the detailed per-scene evaluation results.

### A.2.3. Detailed pose estimation experiments

Tab. 4 presents the average RMSE error on DTU and Replica datasets, while Tab. A3 provide the detailed per-scene evaluation results.

| Scan          |       | 24     | 37     | 40     | 55     | 63     | 65     | 69     | 83     | 97     | 105    | 106    | 110    | 114    | 118    | 122    | Mean   |
|---------------|-------|--------|--------|--------|--------|--------|--------|--------|--------|--------|--------|--------|--------|--------|--------|--------|--------|
| 3DGS-GT       | PSNR  | 31.128 | 29.295 | 25.873 | 36.033 | 34.249 | 32.639 | 32.441 | 37.970 | 31.912 | 36.649 | 37.903 | 34.387 | 34.111 | 40.040 | 40.704 | 34.356 |
|               | SSIM  | 0.841  | 0.887  | 0.865  | 0.970  | 0.949  | 0.964  | 0.935  | 0.963  | 0.937  | 0.933  | 0.951  | 0.945  | 0.931  | 0.959  | 0.969  | 0.933  |
|               | LPIPS | 0.279  | 0.158  | 0.231  | 0.080  | 0.118  | 0.094  | 0.199  | 0.103  | 0.152  | 0.157  | 0.158  | 0.164  | 0.173  | 0.132  | 0.098  | 0.153  |
| 2DGS-GT       | PSNR  | 20.265 | 22.157 | 23.860 | 28.613 | 26.711 | 25.606 | 26.693 | 30.251 | 25.402 | 28.982 | 31.817 | 27.723 | 30.078 | 36.417 | 35.506 | 28.006 |
|               | SSIM  | 0.609  | 0.782  | 0.745  | 0.907  | 0.927  | 0.937  | 0.882  | 0.941  | 0.869  | 0.895  | 0.923  | 0.903  | 0.886  | 0.940  | 0.953  | 0.873  |
|               | LPIPS | 0.489  | 0.230  | 0.326  | 0.154  | 0.144  | 0.134  | 0.276  | 0.130  | 0.232  | 0.204  | 0.193  | 0.216  | 0.226  | 0.158  | 0.118  | 0.215  |
| PGSR-GT       | PSNR  | 27.518 | 26.766 | 25.185 | 35.262 | 28.352 | 27.879 | 29.146 | 30.967 | 27.968 | 30.423 | 30.004 | 32.456 | 34.668 | 40.089 | 38.549 | 31.016 |
|               | SSIM  | 0.841  | 0.905  | 0.906  | 0.978  | 0.944  | 0.963  | 0.911  | 0.950  | 0.922  | 0.937  | 0.954  | 0.937  | 0.957  | 0.973  | 0.976  | 0.937  |
|               | LPIPS | 0.251  | 0.122  | 0.156  | 0.046  | 0.089  | 0.071  | 0.149  | 0.096  | 0.115  | 0.119  | 0.113  | 0.143  | 0.081  | 0.064  | 0.054  | 0.111  |
| FatesGS-GT    | PSNR  | 25.790 | 17.563 | 14.710 | 26.701 | 14.782 | 24.567 | 23.939 | 17.852 | 20.589 | 17.613 | 27.563 | 25.467 | 27.786 | 30.111 | 29.991 | 23.002 |
|               | SSIM  | 0.780  | 0.703  | 0.800  | 0.795  | 0.804  | 0.816  | 0.804  | 0.725  | 0.800  | 0.801  | 0.849  | 0.792  | 0.844  | 0.861  | 0.842  | 0.801  |
|               | LPIPS | 0.343  | 0.281  | 0.280  | 0.315  | 0.240  | 0.374  | 0.333  | 0.438  | 0.323  | 0.375  | 0.351  | 0.400  | 0.296  | 0.332  | 0.358  | 0.336  |
| 3DGS          | PSNR  | 20.938 | 23.568 | 25.674 | 28.973 | 29.863 | 28.280 | 27.256 | 34.471 | 26.401 | 32.361 | 30.170 | 28.248 | 30.539 | 36.792 | 37.067 | 29.373 |
|               | SSIM  | 0.618  | 0.787  | 0.730  | 0.906  | 0.933  | 0.943  | 0.894  | 0.954  | 0.878  | 0.901  | 0.928  | 0.909  | 0.889  | 0.941  | 0.955  | 0.878  |
|               | LPIPS | 0.487  | 0.226  | 0.329  | 0.149  | 0.140  | 0.128  | 0.261  | 0.118  | 0.225  | 0.201  | 0.186  | 0.201  | 0.225  | 0.158  | 0.118  | 0.210  |
| 2DGS          | PSNR  | 20.212 | 16.725 | 21.856 | 28.686 | 26.678 | 25.487 | 26.283 | 27.593 | 22.665 | 28.945 | 30.618 | 26.986 | 30.025 | 30.796 | 35.225 | 26.585 |
|               | SSIM  | 0.603  | 0.724  | 0.693  | 0.907  | 0.926  | 0.932  | 0.876  | 0.929  | 0.820  | 0.894  | 0.924  | 0.900  | 0.885  | 0.910  | 0.950  | 0.858  |
|               | LPIPS | 0.495  | 0.267  | 0.355  | 0.154  | 0.145  | 0.140  | 0.290  | 0.143  | 0.292  | 0.205  | 0.192  | 0.219  | 0.228  | 0.197  | 0.124  | 0.230  |
| PGSR          | PSNR  | 21.146 | 17.712 | 21.858 | 29.532 | 26.743 | 24.684 | 26.983 | 27.803 | 22.494 | 28.793 | 30.880 | 28.184 | 31.726 | 32.199 | 36.279 | 27.134 |
|               | SSIM  | 0.636  | 0.716  | 0.733  | 0.941  | 0.929  | 0.934  | 0.876  | 0.926  | 0.811  | 0.912  | 0.944  | 0.908  | 0.928  | 0.922  | 0.965  | 0.872  |
|               | LPIPS | 0.463  | 0.289  | 0.326  | 0.094  | 0.106  | 0.112  | 0.195  | 0.138  | 0.256  | 0.158  | 0.125  | 0.184  | 0.121  | 0.144  | 0.069  | 0.185  |
| FatesGS       | PSNR  | 16.564 | 16.781 | 20.542 | 23.955 | 29.153 | 20.238 | 23.836 | 24.370 | 20.296 | 22.916 | 25.261 | 24.491 | 26.948 | 31.785 | 29.240 | 23.758 |
|               | SSIM  | 0.506  | 0.729  | 0.662  | 0.828  | 0.947  | 0.889  | 0.798  | 0.894  | 0.783  | 0.833  | 0.876  | 0.867  | 0.844  | 0.911  | 0.916  | 0.819  |
|               | LPIPS | 0.592  | 0.273  | 0.376  | 0.210  | 0.090  | 0.159  | 0.323  | 0.170  | 0.287  | 0.244  | 0.231  | 0.244  | 0.238  | 0.168  | 0.141  | 0.250  |
| CF-3DGS       | PSNR  | 19.495 | 17.156 | 21.760 | 24.198 | 24.421 | 27.438 | 27.590 | 29.752 | 23.873 | 26.474 | 28.559 | 28.852 | 27.106 | 30.780 | 32.207 | 25.977 |
|               | SSIM  | 0.650  | 0.754  | 0.715  | 0.839  | 0.918  | 0.933  | 0.868  | 0.949  | 0.845  | 0.883  | 0.884  | 0.917  | 0.859  | 0.904  | 0.927  | 0.856  |
|               | LPIPS | 0.328  | 0.217  | 0.274  | 0.147  | 0.118  | 0.098  | 0.190  | 0.081  | 0.198  | 0.147  | 0.160  | 0.127  | 0.186  | 0.133  | 0.095  | 0.167  |
| FreeSplatter  | PSNR  | 15.427 | 8.386  | 16.189 | 15.365 | 22.240 | 7.930  | 21.433 | 25.158 | 14.965 | 21.129 | 24.063 | 19.481 | 10.203 | 25.891 | 26.146 | 18.267 |
|               | SSIM  | 0.381  | 0.566  | 0.399  | 0.577  | 0.822  | 0.658  | 0.652  | 0.851  | 0.586  | 0.732  | 0.739  | 0.718  | 0.548  | 0.776  | 0.827  | 0.655  |
|               | LPIPS | 0.434  | 0.304  | 0.379  | 0.238  | 0.139  | 0.246  | 0.233  | 0.111  | 0.311  | 0.228  | 0.207  | 0.211  | 0.322  | 0.169  | 0.132  | 0.244  |
| VGGT          | PSNR  | 13.207 | 15.304 | 15.559 | 17.032 | 19.373 | 13.684 | 20.432 | 23.233 | 17.266 | 19.399 | 20.146 | 21.977 | 13.602 | 22.305 | 22.993 | 18.368 |
|               | SSIM  | 0.511  | 0.735  | 0.619  | 0.744  | 0.868  | 0.827  | 0.744  | 0.898  | 0.754  | 0.807  | 0.803  | 0.836  | 0.723  | 0.832  | 0.860  | 0.771  |
|               | LPIPS | 0.404  | 0.204  | 0.282  | 0.170  | 0.130  | 0.173  | 0.206  | 0.100  | 0.214  | 0.176  | 0.194  | 0.164  | 0.238  | 0.146  | 0.107  | 0.194  |
| Ours(wo Opt.) | PSNR  | 24.615 | 22.975 | 26.135 | 26.706 | 28.720 | 29.818 | 27.434 | 33.895 | 26.526 | 25.759 | 31.803 | 27.280 | 28.393 | 34.096 | 35.101 | 28.617 |
|               | SSIM  | 0.751  | 0.822  | 0.763  | 0.874  | 0.939  | 0.955  | 0.887  | 0.964  | 0.879  | 0.913  | 0.922  | 0.917  | 0.884  | 0.932  | 0.951  | 0.890  |
|               | LPIPS | 0.312  | 0.153  | 0.201  | 0.119  | 0.082  | 0.065  | 0.141  | 0.060  | 0.153  | 0.128  | 0.143  | 0.122  | 0.144  | 0.091  | 0.068  | 0.132  |
| Ours          | PSNR  | 25.909 | 25.376 | 27.419 | 26.491 | 33.835 | 32.678 | 31.306 | 28.887 | 28.919 | 27.382 | 33.239 | 32.483 | 30.114 | 34.646 | 35.083 | 30.251 |
|               | SSIM  | 0.802  | 0.860  | 0.800  | 0.872  | 0.988  | 0.961  | 0.929  | 0.945  | 0.910  | 0.899  | 0.925  | 0.952  | 0.902  | 0.937  | 0.949  | 0.909  |
|               | LPIPS | 0.231  | 0.133  | 0.173  | 0.104  | 0.015  | 0.060  | 0.100  | 0.090  | 0.121  | 0.149  | 0.117  | 0.080  | 0.124  | 0.082  | 0.067  | 0.110  |

Table A6. Detailed NVS experiments on DTU datasets.

| Scan       |       | Office0 | Office1 | Office2 | Room0  | Room1  | Mean   | Scan       |       | 5a48d4 | 5a618c | 5a69c4 | 5b908d | 59338e | Mean   |
|------------|-------|---------|---------|---------|--------|--------|--------|------------|-------|--------|--------|--------|--------|--------|--------|
| 3DGS-GT    | PSNR  | 24.503  | 29.560  | 18.541  | 18.452 | 20.942 | 22.400 | 3DGS-GT    | PSNR  | 18.990 | 16.663 | 17.389 | 18.280 | 17.341 | 17.733 |
|            | SSIM  | 0.848   | 0.883   | 0.749   | 0.786  | 0.755  | 0.804  |            | SSIM  | 0.696  | 0.469  | 0.471  | 0.518  | 0.582  | 0.547  |
|            | LPIPS | 0.417   | 0.348   | 0.456   | 0.428  | 0.393  | 0.409  |            | LPIPS | 0.411  | 0.516  | 0.516  | 0.572  | 0.480  | 0.499  |
| 2DGS-GT    | PSNR  | 24.769  | 27.655  | 17.313  | 18.677 | 18.372 | 21.357 | 2DGS-GT    | PSNR  | 17.751 | 17.420 | 16.283 | 17.722 | 17.027 | 17.241 |
|            | SSIM  | 0.852   | 0.877   | 0.740   | 0.788  | 0.742  | 0.800  |            | SSIM  | 0.687  | 0.469  | 0.462  | 0.520  | 0.576  | 0.543  |
|            | LPIPS | 0.416   | 0.353   | 0.469   | 0.425  | 0.417  | 0.416  |            | LPIPS | 0.418  | 0.512  | 0.522  | 0.570  | 0.483  | 0.501  |
| PGSR-GT    | PSNR  | 24.867  | 28.187  | 18.165  | 18.630 | 20.535 | 22.077 | PGSR-GT    | PSNR  | 18.755 | 17.003 | 16.273 | 19.026 | 17.098 | 17.631 |
|            | SSIM  | 0.793   | 0.880   | 0.701   | 0.739  | 0.753  | 0.773  |            | SSIM  | 0.672  | 0.461  | 0.483  | 0.536  | 0.567  | 0.544  |
|            | LPIPS | 0.450   | 0.293   | 0.494   | 0.457  | 0.398  | 0.418  |            | LPIPS | 0.382  | 0.529  | 0.508  | 0.545  | 0.486  | 0.490  |
| FatesGS-GT | PSNR  | 25.736  | 28.701  | 17.818  | 18.287 | 20.870 | 22.282 | FatesGS-GT | PSNR  | 16.678 | 16.324 | 16.423 | 19.991 | 13.396 | 16.563 |
|            | SSIM  | 0.863   | 0.875   | 0.747   | 0.783  | 0.761  | 0.806  |            | SSIM  | 0.678  | 0.472  | 0.459  | 0.524  | 0.542  | 0.535  |
|            | LPIPS | 0.400   | 0.337   | 0.461   | 0.426  | 0.388  | 0.402  |            | LPIPS | 0.416  | 0.511  | 0.523  | 0.558  | 0.521  | 0.506  |
| 3DGS       | PSNR  | 25.428  | 27.012  | 17.730  | 18.772 | 21.346 | 22.058 | 3DGS       | PSNR  | 24.075 | 16.587 | 18.005 | 18.310 | 16.788 | 18.753 |
|            | SSIM  | 0.861   | 0.861   | 0.745   | 0.785  | 0.758  | 0.802  |            | SSIM  | 0.787  | 0.465  | 0.476  | 0.519  | 0.578  | 0.565  |
|            | LPIPS | 0.411   | 0.357   | 0.464   | 0.434  | 0.391  | 0.411  |            | LPIPS | 0.326  | 0.517  | 0.510  | 0.574  | 0.486  | 0.483  |
| 2DGS       | PSNR  | 23.905  | 26.530  | 17.560  | 18.530 | 19.844 | 21.274 | 2DGS       | PSNR  | 20.773 | 17.093 | 16.617 | 18.195 | 16.371 | 17.810 |
|            | SSIM  | 0.850   | 0.871   | 0.742   | 0.783  | 0.749  | 0.799  |            | SSIM  | 0.722  | 0.464  | 0.467  | 0.520  | 0.573  | 0.549  |
|            | LPIPS | 0.415   | 0.354   | 0.462   | 0.433  | 0.398  | 0.412  |            | LPIPS | 0.386  | 0.513  | 0.519  | 0.569  | 0.489  | 0.495  |
| PGSR       | PSNR  | 24.280  | 25.815  | 17.366  | 18.774 | 20.973 | 21.441 | PGSR       | PSNR  | 22.861 | 16.725 | 17.330 | 19.215 | 16.742 | 18.655 |
|            | SSIM  | 0.780   | 0.871   | 0.691   | 0.743  | 0.750  | 0.767  |            | SSIM  | 0.756  | 0.461  | 0.501  | 0.540  | 0.558  | 0.563  |
|            | LPIPS | 0.465   | 0.301   | 0.509   | 0.463  | 0.404  | 0.428  |            | LPIPS | 0.309  | 0.528  | 0.497  | 0.548  | 0.492  | 0.475  |
| FatesGS    | PSNR  | 24.723  | 30.608  | 17.788  | 19.013 | 20.544 | 22.535 | FatesGS    | PSNR  | 20.626 | 14.752 | 18.949 | 19.419 | 17.816 | 18.312 |
|            | SSIM  | 0.856   | 0.900   | 0.744   | 0.789  | 0.748  | 0.808  |            | SSIM  | 0.772  | 0.418  | 0.498  | 0.526  | 0.612  | 0.565  |
|            | LPIPS | 0.408   | 0.325   | 0.461   | 0.422  | 0.395  | 0.402  |            | LPIPS | 0.333  | 0.537  | 0.496  | 0.552  | 0.466  | 0.477  |
| CF-3DGS    | PSNR  | 22.460  | 24.403  | 12.632  | 15.656 | 16.582 | 18.347 |            |       |        |        |        |        |        |        |

| Threshold            | Office0       |               |               | Office1       |               |               | Office2       |               |               | Room0         |               |               | Room1         |               |               | Average       |               |               |
|----------------------|---------------|---------------|---------------|---------------|---------------|---------------|---------------|---------------|---------------|---------------|---------------|---------------|---------------|---------------|---------------|---------------|---------------|---------------|
|                      | 1cm           | 5cm           | 10cm          |
| 3DGS                 | 1.01%         | 4.79%         | 9.40%         | 1.06%         | 5.04%         | 10.46%        | 1.10%         | 5.52%         | 11.19%        | 0.57%         | 2.75%         | 5.41%         | 1.48%         | 7.22%         | 13.02%        | 1.04%         | 5.07%         | 9.90%         |
| 2DGS                 | 0.65%         | 3.34%         | 6.72%         | 3.08%         | 15.72%        | 29.35%        | 0.83%         | 4.28%         | 8.49%         | 0.75%         | 3.71%         | 7.22%         | 1.85%         | 8.90%         | 16.32%        | 1.43%         | 7.19%         | 13.62%        |
| PGSR                 | 0.43%         | 2.14%         | 4.08%         | 2.44%         | 11.27%        | 20.80%        | 0.67%         | 3.32%         | 6.79%         | 0.35%         | 1.76%         | 3.59%         | 1.11%         | 6.45%         | 12.85%        | 1.00%         | 4.99%         | 9.62%         |
| FatesGS              | 2.39%         | 11.33%        | 26.54%        | 5.29%         | 38.72%        | 72.16%        | 2.63%         | 12.00%        | 22.24%        | 4.62%         | 18.99%        | 34.34%        | 3.66%         | 29.20%        | 43.49%        | 3.72%         | 22.05%        | 39.75%        |
| CF-3DGS              | 0.56%         | 2.91%         | 5.55%         | 0.66%         | 3.28%         | 6.46%         | 0.54%         | 2.82%         | 5.80%         | 0.51%         | 2.61%         | 5.13%         | 1.08%         | 5.42%         | 13.21%        | 0.67%         | 3.41%         | 7.23%         |
| FreeSplatler         | 1.08%         | 5.42%         | 13.21%        | 2.19%         | 10.34%        | 19.84%        | 1.29%         | 5.20%         | 10.84%        | 0.95%         | 5.23%         | 10.57%        | 0.65%         | 3.25%         | 7.04%         | 1.23%         | 5.89%         | 12.30%        |
| VGGT                 | 13.35%        | 59.64%        | 82.39%        | 17.15%        | 66.20%        | 93.56%        | 5.57%         | 39.67%        | 62.52%        | 19.84%        | 59.35%        | 83.97%        | 21.65%        | 77.08%        | 87.19%        | 15.51%        | 60.39%        | 81.93%        |
| <b>Ours(wo Opt.)</b> | <b>20.90%</b> | <b>78.87%</b> | <b>95.39%</b> | <b>16.18%</b> | <b>67.84%</b> | <b>93.84%</b> | <b>10.70%</b> | <b>57.48%</b> | <b>81.57%</b> | <b>28.38%</b> | <b>74.65%</b> | <b>95.84%</b> | <b>31.32%</b> | <b>92.42%</b> | <b>97.59%</b> | <b>21.50%</b> | <b>74.25%</b> | <b>92.85%</b> |
| <b>Ours</b>          | <b>19.15%</b> | <b>79.01%</b> | <b>94.88%</b> | <b>16.66%</b> | <b>67.27%</b> | <b>95.31%</b> | <b>8.32%</b>  | <b>51.51%</b> | <b>73.38%</b> | <b>26.05%</b> | <b>73.10%</b> | <b>93.58%</b> | <b>31.53%</b> | <b>89.88%</b> | <b>95.30%</b> | <b>20.34%</b> | <b>72.15%</b> | <b>90.49%</b> |

Table A9. Depth accuracy $\uparrow$  under different thresholds on Replica datasets.

|                           | Office0 | Office1 | Office2 | Room0 | Room1 | Mean  |
|---------------------------|---------|---------|---------|-------|-------|-------|
| <b>Ours</b>               | 30.96   | 33.91   | 51.49   | 28.08 | 23.87 | 33.66 |
| No $\mathcal{L}_{rank}$   | 38.42   | 35.24   | 54.30   | 28.51 | 24.66 | 36.23 |
| No $\mathcal{L}_{smooth}$ | 38.39   | 39.08   | 53.59   | 26.81 | 30.70 | 37.71 |
| No $\mathcal{L}_{MVS}$    | 27.33   | 32.55   | 55.77   | 29.29 | 31.87 | 35.36 |
| No $T_k^{cam}$            | 37.46   | 32.25   | 55.61   | 27.64 | 32.29 | 37.05 |
| <b>Ours(wo Opt.)</b>      | 39.05   | 41.56   | 66.04   | 26.30 | 27.28 | 40.05 |
| No Trim                   | 40.75   | 43.89   | 66.04   | 25.48 | 27.29 | 40.69 |
| No $\mathbb{D}$           | 59.48   | 38.02   | 112.69  | 44.77 | 44.21 | 59.83 |

Table A10. Detailed ablation experiments, CD(mm) $\downarrow$ , on Replica datasets.

#### A.2.4. Detailed optimization speed experiments

Tab. 5 presents the average time consumption of optimization based reconstruction algorithms on Replica datasets, while Tab. A11 provides the detailed per-scene evaluation results.

|         | 3DGS   | 2DGS   | FatesGS | PGSR   | FSFSplatter |
|---------|--------|--------|---------|--------|-------------|
| Office0 | 407.72 | 800.88 | 638.38  | 873.45 | 105.19      |
| Office1 | 383.28 | 938.22 | 975.06  | 1102.7 | 103.22      |
| Office2 | 438.57 | 825.10 | 811.89  | 1037.2 | 112.44      |
| Room0   | 434.96 | 775.38 | 838.49  | 853.54 | 106.88      |
| Room1   | 482.75 | 862.31 | 1315.8  | 1224.1 | 109.23      |
| Average | 429.45 | 840.37 | 915.93  | 1018.1 | 107.39      |

Table A11. Detailed optimization speed experiments(seconds) $\downarrow$  on Replica datasets.

#### A.2.5. Depth estimation experiments

|                      | Office0      | Office1      | Office2      | Room0        | Room1        | Average      |
|----------------------|--------------|--------------|--------------|--------------|--------------|--------------|
| 3DGS                 | 142.90       | 73.45        | 243.8        | 150.8        | 93.98        | 140.9        |
| 2DGS                 | 66.55        | 30.96        | 86.62        | 109.1        | 82.09        | 75.08        |
| PGSR                 | 111.1        | 88.70        | 116.3        | 249.0        | 122.1        | 137.4        |
| FatesGS              | 26.35        | 9.278        | 69.81        | 25.78        | 28.12        | 31.87        |
| CF-3DGS              | 235.0        | 501.6        | 194.7        | 169.1        | 99.47        | 240.0        |
| FreeSplatler         | 99.47        | 35.36        | 140.2        | 122.2        | 77.58        | 94.97        |
| VGGT                 | 7.713        | 4.488        | 27.80        | 6.450        | 5.444        | 10.38        |
| <b>Ours(wo Opt.)</b> | <b>7.194</b> | <b>7.607</b> | <b>23.39</b> | <b>7.145</b> | <b>3.436</b> | <b>9.755</b> |
| <b>Ours</b>          | <b>5.089</b> | <b>4.203</b> | <b>26.86</b> | <b>4.850</b> | <b>3.616</b> | <b>8.924</b> |

Table A12. Depth mean distance(cm) $\downarrow$  on Replica datasets.

We have conducted detailed quantitative experiments on surface reconstruction on DTU and Replica datasets, as shown in Tab. 1 and Tab. 3. To further validate the geometric reconstruction accuracy of FSFSplatter, we evaluated performance on depth map synthesis using Replica datasets. As shown in Tab. A9 and Tab. A12, we assessed the mean depth error [10] and the accuracy under different thresholds. The results demonstrate that FSFSplatter exhibits excellent robustness and accuracy both with and without per-scene optimization.

## References

- [1] Aanaes, HenrikJensen, Rasmus RamsbolVogiatzis, George-Tola, EnginDahl, and Anders Bjorholm. Large-scale data for multiple-view stereopsis. *International Journal of Computer Vision*, 120(2), 2016. 1
- [2] Lue Fan, Yuxue Yang, Minxing Li, Hongsheng Li, and Zhaoxiang Zhang. Trim 3d gaussian splatting for accurate geometry representation. *arXiv preprint arXiv:2406.07499*, 2024. 1
- [3] Seongbo Ha, Jiung Yeon, and Hyeonwoo Yu. Rgb-d gs-icp slam. In *European Conference on Computer Vision*, pages 180–197. Springer, 2024. 1, 2
- [4] Binbin Huang, Zehao Yu, Anpei Chen, Andreas Geiger, and Shenghua Gao. 2d gaussian splatting for geometrically accurate radiance fields. In *SIGGRAPH 2024 Conference Papers*. Association for Computing Machinery, 2024. 1
- [5] Han Huang, Yulun Wu, Chao Deng, Ge Gao, Ming Gu, and Yu-Shen Liu. Fatesgs: Fast and accurate sparse-view surface reconstruction using gaussian splatting with depth-feature consistency. In *Proceedings of the AAAI Conference on Artificial Intelligence*, 2025. 1
- [6] Jianyuan Wang, Minghao Chen, Nikita Karaev, Andrea Vedaldi, Christian Rupprecht, and David Novotny. Vggt: Visual geometry grounded transformer. In *Proceedings of the IEEE/CVF Conference on Computer Vision and Pattern Recognition*, 2025. 2
- [7] Shuzhe Wang, Vincent Leroy, Yohann Cabon, Boris Chidlovskii, and Jerome Revaud. Dust3r: Geometric 3d vision made easy. In *CVPR*, 2024. 2
- [8] H. Yang, J. Shi, and L. Carlone. TEASER: Fast and Certifiable Point Cloud Registration. *IEEE Trans. Robotics*, 2020. 1

- [9] Jianing Yang, Alexander Sax, Kevin J. Liang, Mikael Henaff, Hao Tang, Ang Cao, Joyce Chai, Franziska Meier, and Matt Feiszli. Fast3r: Towards 3d reconstruction of 1000+ images in one forward pass. In *Proceedings of the IEEE/CVF Conference on Computer Vision and Pattern Recognition (CVPR)*, 2025. 2
- [10] Yao Yao, Zixin Luo, Shiwei Li, Tian Fang, and Long Quan. Mvsnet: Depth inference for unstructured multi-view stereo. *European Conference on Computer Vision (ECCV)*, 2018. 4
- [11] Yao Yao, Zixin Luo, Shiwei Li, Jingyang Zhang, Yufan Ren, Lei Zhou, Tian Fang, and Long Quan. Blendedmvs: A large-scale dataset for generalized multi-view stereo networks. In *Proceedings of the IEEE/CVF conference on computer vision and pattern recognition*, pages 1790–1799, 2020. 1
- [12] Zongxin Ye, Wenyu Li, Sidun Liu, Peng Qiao, and Yong Dou. Absgs: Recovering fine details for 3d gaussian splatting, 2024. 1
- [13] Qian-Yi Zhou, Jaesik Park, and Vladlen Koltun. Open3D: A modern library for 3D data processing. *arXiv:1801.09847*, 2018. 2
